# Supplementary material
Source: publisher figshare collection journal article supplement (https://acs.figshare.com/ndownloader/files/4598089)
Supplement: Supplementary file 1 [file 4598089]

## **Supporting information for:**

### **Patterned arrays of vertically aligned carbon nanotube microelectrodes on graphitic carbon films prepared by thermal chemical vapor deposition**

**Xianming Liu,<sup>†</sup> Keith H. R. Baronian,<sup>‡</sup> and Alison J. Downard<sup>\*†</sup>**

*MacDiarmid Institute for Advanced Materials and Nanotechnology, Department of  
Chemistry, University of Canterbury, Private Bag 4800, Christchurch 8140, New  
Zealand, and Christchurch Polytechnic Institute of Technology, PO Box 540,  
Christchurch 8140, New Zealand*

#### **Contents:**

Figure S1: Procedure for patterning Al/Fe catalyst spots on PPF using electron beam  
lithography (EBL);

and

Description of procedure for patterning pyrolyzed photoresist film (PPF) substrate  
with Al/Fe catalyst spots using electron beam lithography (EBL).

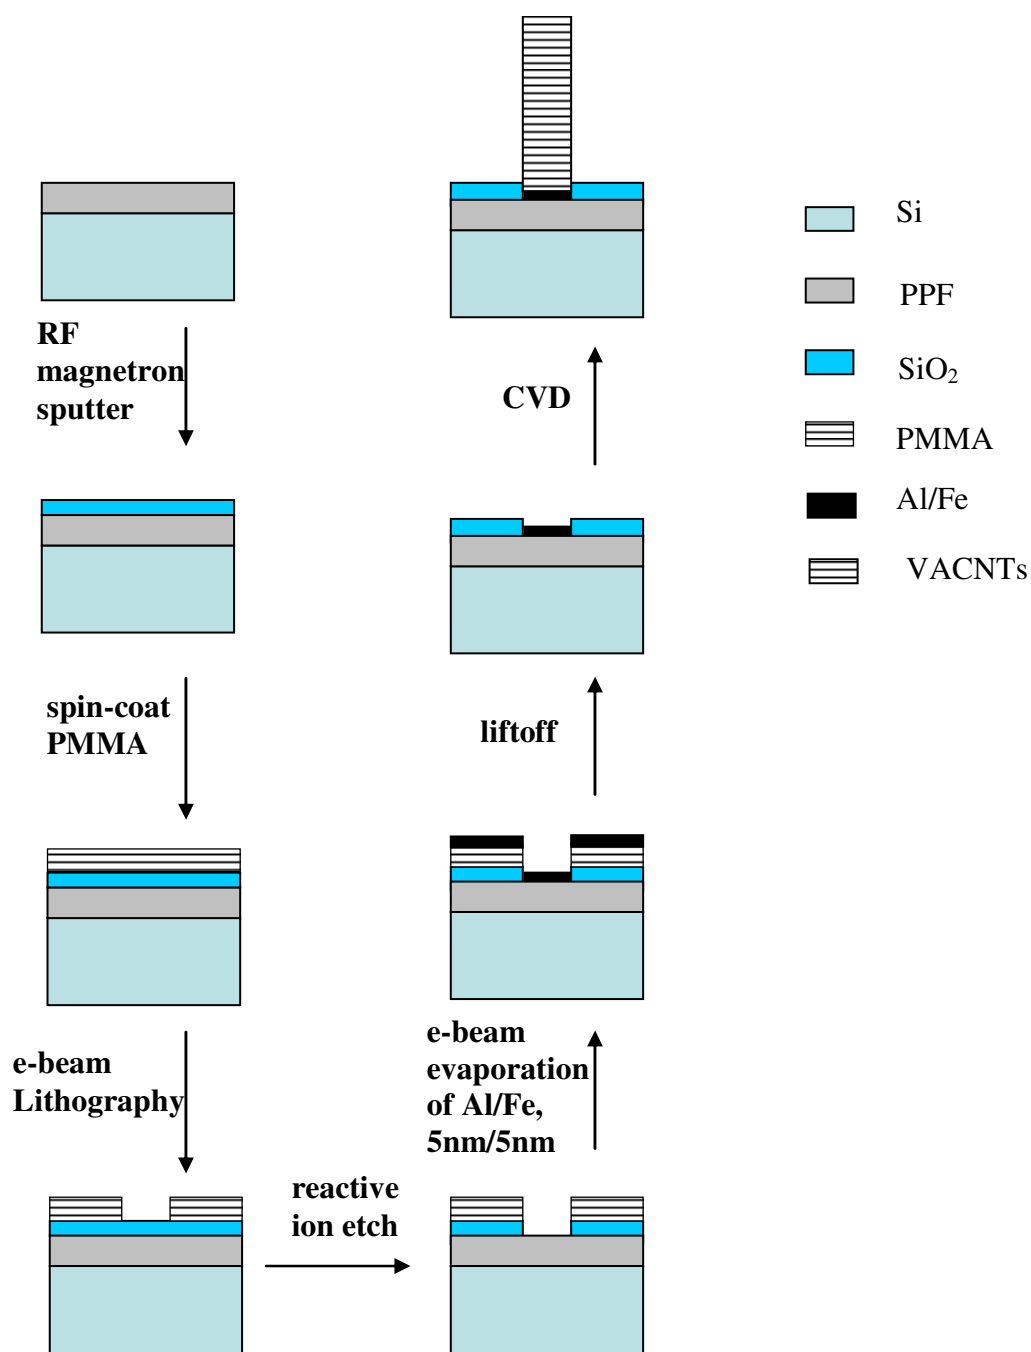

**Figure S1.** Procedure for patterning Al/Fe catalyst spots on PPF using electron beam lithography (EBL)

**Procedure for patterning the substrate prior to deposition of Al and Fe catalyst layers.** A thin layer (~ 40 nm, measured with a Dektak II profilometer) of SiO<sub>2</sub> was deposited on PPF using a radio frequency (RF) magnetron sputterer in Ar plasma ( $4.2 \times 10^{-3}$  Torr, 10 min, 200 W, 10 sccm). Approximately 360 nm of

polymethylmethacrylate (PMMA) in *o*-xylene was spin-coated on the SiO<sub>2</sub>-PPF substrate. The samples were pre-baked at 180 °C for 1.5 min on a hotplate. The PMMA was patterned using electron beam lithography (EBL), conducted at an acceleration voltage of 20 keV with an electron beam dosage of 250  $\mu\text{C}/\text{cm}^2$ . The patterned PMMA was developed in 1:3 methyl isobutyl ketone : isopropanol for 30 s, and the samples were post-baked on a hotplate at 100 °C for 2 min. After removing PMMA residues from the patterned areas (O<sub>2</sub> plasma, 15 s), exposed SiO<sub>2</sub> was removed using reactive ion etching (RIE, Plasmalab 80plus, Oxford Instruments) in a CHF<sub>3</sub>/Ar (50 sccm/15 sccm) mixture at -25 °C. The plasma was applied at 200 W with a pressure of 0.03 Torr for 1 min.

The purpose of the SiO<sub>2</sub> layer in the above procedure, was to prevent direct contact between PMMA and PPF. When PMMA was deposited directly on PPF, it could not be completely removed during developing.
